# Supplementary material for: Constitutive Clathrin-mediated Endocytosis of CTLA-4 Persists during T Cell Activation
Source: PubMed Central journal article supplement — J Biol Chem. 2012 Jan 19;287(12):9429–40. doi: 10.1074/jbc.M111.304329 (PMC3308817; doi:10.1074/jbc.m111.304329), 2012-01-19
Supplement: supp_M111.304329_jbc.M111.304329-1.pdf [file supp_M111.304329_jbc.M111.304329-1.pdf]

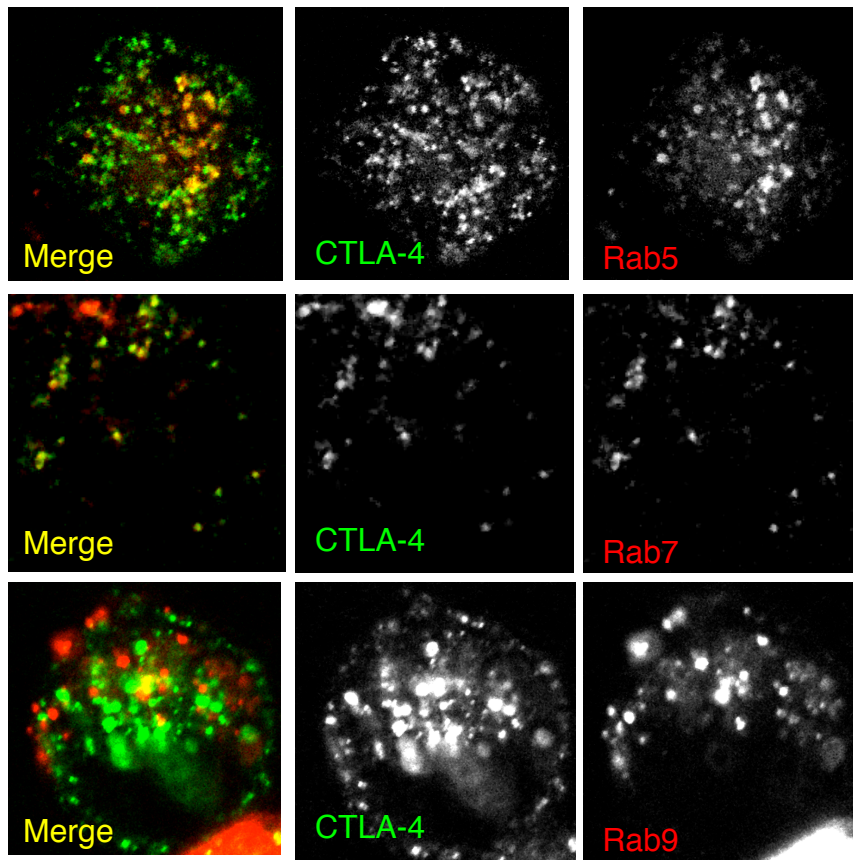

**Supplementary Figure 1. Co-localisation of CTLA-4 with Rab5, Rab7 and Rab9**  
CTLA-4 expressing CHO cells co-transfected with DsRed-tagged Rab5, Rab7 or Rab9 were incubated with Alexa488-conjugated anti-CTLA-4 for 60 minutes before fixation and visualization by confocal microscopy.

**Figure S1**
